# Supplementary material for: The unexpected effect of the compound microbial agent NP-M2 on microbial community dynamics in a nonylphenol-contaminated soil: the self-stability of soil ecosystem
Source: PeerJ. 2024 May 30;12:e17424. doi: 10.7717/peerj.17424 (PMC11144391; doi:10.7717/peerj.17424)
Supplement: Supplemental Information 3 [file peerj-12-17424-s003.xlsx]

## Sheet: Sheet1
24d	S-CAT	S-UE	S-SC	S-PPO
TU50	47.8665	26.6074	98.4096	49.632
	48.0876	31.9734	93.4116	59.808
	47.3748	27.8275	97.6548	50.352
	47.7708	31.7373	103.816	62.16
TU200	47.5497	24.049	146.921	65.152
	48.3087	27.3814	137.843	59.856
	48.4968	28.2211	150.246	62.608
	47.0778	30.9501	140.617	60.496
J50	49.1799	25.9382	85.476	32.896
	48.8631	27.7488	94.3704	40.656
	48.5925	23.8259	79.9068	36.96
	48.9456	29.2314	90.2292	39.136
J200	47.7477	26.0957	98.2668	38.944
	48.7938	28.8509	101.47	45.232
	49.0215	33.8496	89.2092	46.8
	48.873	34.2826	98.8788	50.752
