# Supplementary material for: The unexpected effect of the compound microbial agent NP-M2 on microbial community dynamics in a nonylphenol-contaminated soil: the self-stability of soil ecosystem
Source: PeerJ. 2024 May 30;12:e17424. doi: 10.7717/peerj.17424 (PMC11144391; doi:10.7717/peerj.17424)
Supplement: Supplemental Information 4 [file peerj-12-17424-s004.xlsx]

## Sheet: Sheet1
day（d）	TU50			TU200			J50			J200			CK50			CK200
0	45.75	41.39	43.5	188	184.71	207.38	44.83	48.44	49.4	186.96	202.99	211.5	40.18	61.88	41.66	209.19	242.39	204.2
8	29.51	40.3	36.68	129.16	136.58	122.9	10.81	20.6	11.59	76.58	98.5	93.15	46.24	52.24	54.65	205.41	221.41	195.68
16	23.04	23.64	34.85	91.6	84.41	82.85	14.16	10	10.18	25.23	14.22	16.25	43.18	52.99	49.53	182.22	230.16	174.11
24	3.82	4.76	2.86	14.54	19	16.7	9.66	5.53	5.95	9.06	11.46	8.32	40.57	38.45	56.13	192.79	173.94	198.77
32	5.55	6.68	6.81	9.15	6.25	8.5	5.9	7.17	7.23	4.4	9.56	8.16	39.69	40.06	52.74	164.26	170.14	204.1
56	3.35	3.1	3.23	2.71	3.03	2.77	1.75	1.29	1.54	1.67	1.67	1.23	36.6	48.99	51.89	170.18	165.68	199.64
64	2.34	3.24	3.34	1.94	1.35	1.47	1.6	4.15	4.61	2	2	3.01	39.44	51.37	40.91	186.49	182.5	157.94
